# Supplementary material for: Probiotic yeast BR14 ameliorates DSS-induced colitis by restoring the gut barrier and adjusting the intestinal microbiota
Source: Royal Society of Chemistry journal article supplement (doi:10.1039/d1fo01314a), 2021-01-01
Supplement: d1fo01314a1.pdf [file d1fo01314a1.pdf]

## Supporting Information

**Table S1. The region of different yeast strains.**

| Region                    | Strains Number    |
|---------------------------|-------------------|
| Shaoxing rice wine        | BR14、BR16         |
| Chinese rice wine         | BR28              |
| Fruit wine                | BR49              |
| Hongqu rice wine          | BR54              |
| Kefir                     | BR142、BR147、BR155 |
| Grain                     | BR161、BR167       |
| Lees of Chinese rice wine | BR178             |
| Distilled grain of liquor | N1、N4、N6-1、N8     |

**Table S2. The standard scoring system of disease activity index (DAI).**

| Score | Body weight loss | Occult blood             | Stool consistency |
|-------|------------------|--------------------------|-------------------|
| 0     | no loss          | no blood                 | normal            |
| 1     | 0% ~ 5%          | Presence (outside 1 min) | loose stools      |
| 2     | 6% ~ 10%         | Presence (within 30 sec) | loose stools      |
| 3     | 11% ~ 15%        | Presence (within 10 sec) | diarrhea          |
| 4     | >15%             | gross blood              | Diarrhea (liquid) |

**Table S3. The primer sequences used for RT-PCR.**

| Gene  | Forward primer (5'-3')  | Reverse primer (5'-3')    | Annealing temperature (°C) | Product length (bp) |
|-------|-------------------------|---------------------------|----------------------------|---------------------|
| TNF-a | ACGTGGAAGCTGGCAGAAGAG   | AGGGTCTGGGCCATAGAAGT      | 60                         | 208                 |
| IL-6  | GAGGATACCACTCCCAACAGACC | AAGTGCATCATCGTTGTTTCATACA | 60                         | 141                 |
| IL-10 | GGTTGCCAAGCCTTATCGGA    | ACCTGCTCCACTGCCTTGCT      | 60                         | 191                 |
| ZO-1  | GGGGCCTACACTGATCAAGA    | TGGAGATGAGGCTTCTGCTT      | 60                         | 234                 |
| MUC-2 | GATAGGTGGCAGACAGGAGA    | GCTGACGAGTGGTTGGTGAATG    | 60                         | 134                 |
| MUC-3 | CGTGGTCAACTGCGAGAATGG   | CGGCTCTATCTCTACGCTCTCC    | 60                         | 112                 |
